# Supplementary material
Source: Royal Society of Chemistry journal article supplement (doi:10.1039/d5cs00964b)
Supplement: d5cs00964b1.pdf [file d5cs00964b1.pdf]

Electronic Supplementary Information (ESI) for *Chemical Society Reviews*

**Ternary organic solar cells: Optimizing the third components**

Pachaiyappan Murugan,<sup>b</sup> Yu-Long Peng,<sup>a</sup> Shi-Yong Liu<sup>\*a</sup> and Hongzheng Chen<sup>\*c</sup>

<sup>a</sup>*School of Chemical Engineering, Guangdong University of Petrochemical Technology, Maoming, Guangdong 525000, China. E-mail: [chelsy@zju.edu.cn](mailto:chelsy@zju.edu.cn). (S.-Y. Liu)*

<sup>b</sup>*Saveetha Medical College and Hospital, Saveetha Institute of Medical and Technical Sciences, Kancheepuram District, Chennai, Tamil Nadu, India. Email: [p.kumu29@gmail.com](mailto:p.kumu29@gmail.com).*

<sup>c</sup>*State Key Laboratory of Silicon and Advanced Semiconductor Materials, Department of Polymer Science and Engineering, Zhejiang University, Hangzhou 310058, China. Email: [hzchen@zju.edu.cn](mailto:hzchen@zju.edu.cn)*

**Table S1.** Characteristics of the devices used in PDI derivatives based TOSCs and optoelectronic properties of NFAs (HOMO, LUMO, and  $E_g$  for A2).

| D1      | A1                  | A2        | HOMO (eV) | LUMO (eV) | $E_g$ (eV) | Additive (%)    | Coating Solvent | Coating method | $J_{sc}$ (mA $cm^{-2}$ ) | $V_{oc}$ (V) | FF (%) | PCE (%) | Ref |
|---------|---------------------|-----------|-----------|-----------|------------|-----------------|-----------------|----------------|--------------------------|--------------|--------|---------|-----|
| PTB7-Th | SF-4PDI             | TPE-4PDI  | -6.29     | -4.20     | 2.09       | 2.5% CN         | CB              | SC             | 15.09                    | 0.85         | 48.6   | 6.19    | s1  |
| FBT     | PC <sub>61</sub> BM | PDI       | -5.9      | -3.7      | 2.2        | 1% anisaldehyde | o-xylene        | SC             | 13.4                     | 0.86         | 68.0   | 7.9     | s2  |
| PTB7-Th | ITIC                | PDI       | -6.10     | -3.90     | 2.2        | 0.4% DIO        | CF              | SC             | 18.37                    | 0.84         | 56.0   | 8.64    | s3  |
| PTB7-Th | PBI-Por             | PDI-V     | -5.99     | -3.87     | 2.12       |                 | CB              | SC             | 17.54                    | 0.75         | 69.1   | 9.43    | s4  |
| PBDB-T  | ITIC                | PMIA-0    | -5.93     | -3.83     | 2.1        | 1% 1-CN         | o-DCB           | SC             | 17.38                    | 0.89         | 61.0   | 9.77    | s5  |
| PTB7-th | IDT-2BR             | PDI-2DTT  | -5.60     | -3.90     | 1.7        | 3% DPE          | DCB             | SC             | 14.8                     | 1.04         | 65.4   | 10.1    | s6  |
| PDBT-T1 | ITIC-Th             | SdiPBI-Se | -6.09     | -3.87     | 2.22       | 0.7% DIO        | DCM             | SC             | 15.50                    | 0.93         | 70.8   | 10.27   | s7  |
| PTB7-Th | PC <sub>71</sub> BM | TPE-4PDI  | -5.95     | -3.88     | 2.07       | 3% DIO          | CB              | SC             | 17.89                    | 0.79         | 74.7   | 10.4    | s8  |
| PM6     | Y6                  | TPA-4PDI  | -6.04     | -3.69     | 2.35       | 0.25% DIO       | CF              | SC             | 27.55                    | 0.84         | 78.2   | 18.29   | s9  |

**Table S2.** Characteristics of the devices used in IDT derivatives (IDIC, IEIC, IT-4F, ITIC-, ITM)-based TOSCs and optoelectronic properties of SMAs (HOMO, LUMO, and  $E_g$  for A2).

| D1         | A1                  | A2          | HOMO (eV) | LUMO (eV) | $E_g$ (eV) | Additive (%) | Coating Solvent | Coating method | $J_{sc}$ (mA $cm^{-2}$ ) | $V_{oc}$ (V) | FF (%) | PCE (%) | Ref |
|------------|---------------------|-------------|-----------|-----------|------------|--------------|-----------------|----------------|--------------------------|--------------|--------|---------|-----|
| <b>IDT</b> |                     |             |           |           |            |              |                 |                |                          |              |        |         |     |
| PBTA-BO    | PC <sub>61</sub> BM | IFBR        | -5.69     | -3.64     | 2.05       |              | DCB             | SC             | 13.45                    | 0.92         | 65.07  | 8.11    | s10 |
| PBTA-BO    | PC <sub>71</sub> BM | IffBR       | -5.71     | -3.77     | 1.94       |              | CB              | SC             | 14.66                    | 0.91         | 68.12  | 9.06    | s11 |
| PTB7-Th:   | EH-                 | EH-         | -5.58     | -3.90     | 1.68       |              | oDCB            | SC             | 15.39                    | 0.97         | 60.5   | 9.19    | s12 |
|            | 5T-TTC              | IDTBR       |           |           |            |              |                 |                |                          |              |        |         |     |
| PTB7-th    | PC <sub>71</sub> BM | IDT2BR      | -5.52     | -3.84     | 1.68       | DIO          | CB              | SC             | 17.22                    | 0.83         | 0.65   | 9.37    | s13 |
| PBDB-T     | PC <sub>71</sub> BM | IDT-OT      | -5.11     | -3.46     | 1.65       | 0.5%         | CB              | SC             | 15.35                    | 0.86         | 68.1   | 9.09    | s14 |
|            |                     |             |           |           |            | DIO          |                 |                |                          |              |        |         |     |
| PBDB-T     | PC <sub>71</sub> BM | IDTC-4CI    | -5.50     | -3.79     | 1.71       | 0.5% CN      | CF              | SC             | 19.14                    | 0.82         | 65.6   | 10.41   | s15 |
| PBDB-T     | PC <sub>71</sub> BM | IDT-2O      | -5.72     | -3.85     | 1.87       | -            | DCB             | SC             | 17.20                    | 0.88         | 73.49  | 10.67   | s16 |
| PCE10      | IDTBR:              | IDFBR       | -5.75     | -3.70     | 2.05       |              | CB              | SC             | 17.3                     | 1.04         | 0.7    | 11.4    | s17 |
| T2-ORH     | T2-ORH              | EH-         | -5.42     | -3.60     | 1.82       |              | CF              | CB             | 17.51                    | 1.0          | 63.0   | 11.55   | s18 |
|            |                     | IDTBR       |           |           |            |              |                 |                |                          |              |        |         |     |
| P1         | ITCPTC              | IDT6CN      |           |           |            | 0.3%         | CB              | SC             | 17.81                    | 0.87         | 76.5   | 11.92   | s19 |
|            |                     |             |           |           |            | DIO          |                 |                |                          |              |        |         |     |
| PTB7-Th    | F8IC                | IDT-2BR.    | -5.52     | -3.69     | 1.83       | 0.5%         | CF              | SC             | 25.1                     | 0.68         | 69.9   | 12.1    | s20 |
|            |                     |             |           |           |            | DIO          |                 |                |                          |              |        |         |     |
| PTB7-Th    | T2-ORH              | T2-OEHRH    | -5.65     | -3.58     | 2.07       | 1% DPE       | ToI             | SC             | 18.05                    | 1.04         | 65.0   | 12.1    | s21 |
| BDB-T      | ITIC                | IDT-T       | -5.73     | 3.59      | 2.14       | 0.5%         | CB              | SC             | 17.9                     | 0.93         | 73.1   | 12.2    | s22 |
|            |                     |             |           |           |            | DIO          |                 |                |                          |              |        |         |     |
| PCE10      | F8IC                | Eh-IDTBR    | -5.45     | -3.90     | 1.55       | 0.5%         | CB              | SC             | 12.26                    | 0.81         | 73.02  | 12.27   | s23 |
|            |                     |             |           |           |            | DPE          |                 |                |                          |              |        |         |     |
| PBDB-T     | ITC6-2F             | IDT-PDOT-C6 | -5.47     | -3.80     | 1.67       |              | DCB             | SC             | 21.73                    | 0.85         | 72.06  | 13.36   | s24 |
| PM6        | C8-SF               | Y-MODF      | -5.81     | -3.90     | 1.91       |              | CF              | SC             | 20.88                    | 0.84         | 75.87  | 13.39   | s25 |
| BDB-T      | IDTT-OB             | IDT-PDOT-C6 | -5.59     | -4.17     | 1.42       | 0.2%         | o-DCB           | SC             | 20.06                    | 0.92         | 70.41  | 13.4    | s26 |
|            |                     |             |           |           |            | DIO          |                 |                |                          |              |        |         |     |
| PBDB-T     | INPIC-Si            | IDTO-T-4F   | -5.58     | -4.04     | 1.54       | 0.5%         | CB              | SC             | 22.55                    | 0.87         | 74.18  | 14.55   | s27 |
|            |                     |             |           |           |            | DIO          |                 |                |                          |              |        |         |     |
| PBDB-T     | IE4F-S              | IBC-F       | -5.62     | -3.53     | 2.09       |              | CB              | SC             | 22.83                    | 0.88         | 74.4   | 15.06   | s28 |
| PM6        | Y6                  | O-IDTBR     | -5.68     | -4.13     | 1.55       | 1% 1-CN      | CB              | SC             | 25.75                    | 0.85         | 0.76   | 16.60   | s29 |
| PM6        | Y6                  | IDT-TNIC    | -5.53     | -3.92     | 1.61       | 1-CN         | CF              | SC             | 25.90                    | 0.86         | 75.9   | 17.00   | s30 |
| PM6        | Y6                  | IDT-T-PCN   | -5.48     | 3.74      | 1.74       | 1% 1-CN      | CF              | SC             | 26.56                    | 0.85         | 76.1   | 17.36   | s31 |
| PM6        | BTP-eC9             | IDTR        | -5.29     | -3.31     | 1.98       | 0.5% 1-CN    | CF              | SC             | 28.14                    | 0.86         | 80.55  | 19.54   | s32 |
| PDCBT      | PCBM                | ITIC        |           |           |            |              | DCM:DIM         | SC             | 10.12                    | 0.87         | 71.0   | 6.20    | s33 |
| PBTOTT     | PC <sub>71</sub> BM | ITIC        | -5.64     | -4.04     | 1.6        | 0.3%         | CB              | SC             | 15.0                     | 0.88         | 64.2   | 8.18    | s34 |
|            |                     |             |           |           |            | DIO          |                 |                |                          |              |        |         |     |
| PBDB-T     | PCBM                | ITIC        |           |           |            |              | CB              | SC             | 15.0                     | 0.87         | 65.0   | 8.6     | s35 |
| TP         | IEICO-4F            | ITIC        | -5.48     | -3.83     | 1.65       | 0.5%         | CB              | SC             | 18.00                    | 0.87         | 58.0   | 9.10    | s36 |
|            |                     |             |           |           |            | DIO          |                 |                |                          |              |        |         |     |

|                 |                      |               |       |       |      |                |     |    |       |      |       |       |     |
|-----------------|----------------------|---------------|-------|-------|------|----------------|-----|----|-------|------|-------|-------|-----|
| PBTTFB          | PC <sub>70</sub> BM  | ITIC          | -5.71 | -4.12 | 1.59 | 3% DPE         | CB  | SC | 13.73 | 1.01 | 71.0  | 9.73  | s37 |
| PBDB-T          | ITIC                 | ITIC-Th       | -5.66 | -3.93 | 1.73 | 0.5 %<br>DIO   | CB  | SC | 16.5  | 0.91 | 67.0  | 9.76  | s38 |
| PTB7-Th         | FBR-CN               | ITIC-Th       | -5.68 | -4.11 | 1.57 | 3%-1-<br>CN    | CB  | SC | 17.76 | 0.80 | 69.9  | 9.82  | s39 |
| PBDB-T          | PC <sub>71</sub> BM  | ITIC          | -     | -3.78 |      | 0.1%<br>F4TCNQ | CB  | SC | 16.12 | 0.89 | 70.0  | 9.94  | s40 |
| P1              | PC <sub>71</sub> BM  | ITIC          | -5.49 | -3.89 | 1.6  | 2% DPE         | ToI | SC | 17.80 | 0.92 | 63.7  | 10.21 | s41 |
| PDBT-T1         | SdiPBI-Se            | ITIC-Th       | -5.66 | -3.93 | 1.73 | 0.7%<br>DIO    | DCM | SC | 15.50 | 0.93 | 70.8  | 10.27 | s7  |
| PTzBT           | PC <sub>71</sub> BM  | ITIC          | -5.68 | -3.75 | 1.93 |                | CB  | SC | 16.5  | 0.89 | 70.0  | 10.3  | s42 |
| PBDTBDD         | PC <sub>60</sub> BM  | ITIC          |       |       |      | 0.5%<br>DIO    | DCM | SC | 17.76 | 0.91 | 63.4  | 10.36 | s43 |
| PPBDTBT         | PC <sub>71</sub> BM  | ITIC          | -5.51 | -3.78 | 1.73 | 0.2%<br>DIO    | DCM | SC | 16.85 | 0.89 | 66.2  | 10.41 | s44 |
| PDBTT1          | PC <sub>70</sub> BM  | ITIC-Th       | -5.66 | -3.93 | 1.73 | 1% DIO         | CF  | SC | 15.72 | 0.93 | 71.1  | 10.48 | s45 |
| PBDB-T          | ITIF                 | ITIC          | -5.54 | -3.84 | 1.7  | 0.5%<br>DIO    | CB  | SC | 17.31 | 0.86 | 70.0  | 10.53 | s46 |
| PBDB-T          | SR197                | ITIC          | -5.48 | -3.83 | 1.65 |                | CB  | SC | 18.59 | 0.87 | 67.7  | 11.03 | s47 |
| PBDB-T          | FBR                  | ITIC          | -5.54 | -3.84 | 1.7  |                | CB  | SC | 18.73 | 0.91 | 65.0  | 11.17 | s48 |
| PDOT            | PC <sub>71</sub> BM  | ITIC          | -5.61 | -3.89 | 1.72 | 1% DIO         | CB  | SC | 17.49 | 0.96 | 66.8  | 11.21 | s49 |
| PTBTz-2         | PC <sub>71</sub> BM  | ITIC          | -5.63 | -3.97 | 1.66 | DIO            |     |    | 20.75 | 0.89 | 60.9  | 11.26 | s50 |
| PBDB-T          | SR197                | ITIC          | -5.48 | -3.83 | 1.65 |                | CB  | SC | 18.23 | 0.87 | 67.7  | 11.03 | s47 |
| P3TCO-1         | PC <sub>71</sub> BM  | ITIC          | -5.51 | -3.78 | 1.73 |                | CB  | SC | 18.16 | 0.94 | 66.7  | 11.41 | s51 |
| J71             | IT-M                 | ITIC          | -5.58 | -4.02 | 1.56 | 0.2%<br>DIO    | CF  | SC | 18.08 | 0.97 | 65.6  | 11.60 | s52 |
| FTAZ            | IDIC                 | ITIC-Th-<br>O | -5.36 | -3.91 | 1.45 | 0.4%<br>DIO    | CF  | SC | 18.9  | 0.86 | 72.3  | 11.6  | s53 |
| J71             | MeIC2                | ITIC          | -5.51 | 3.92  | 1.59 |                | CF  | SC | 18.1  | 0.91 | 70.5  | 11.6  | s54 |
| PBDT-2TC        | 4TBA                 | 6TBA          | -     |       |      |                | DCB | SC | 16.6  | 0.96 | 73.0  | 11.73 | s55 |
| PBDB-T          | IEICO-4F             | 4TIC          |       |       |      | DIO            | CB  | SC | 21.64 | 0.82 | 67.5  | 11.82 | s56 |
| PBDB-T          | IDT6CN-M             | ITCPTC.       |       |       |      | 0.3%<br>DIO    | CB  | SC | 17.81 | 0.87 | 76.2  | 11.92 | s19 |
| PBDTPD-HT       | PC <sub>70</sub> BM. | ITIC          | -5.58 | -4.02 | 1.56 | 0.8%<br>DIO    | CF  | SC | 17.38 | 0.95 | 74.0  | 12.09 | s57 |
| PTB7-Th         | COi8DFIC             | ITIC-4F       | -5.90 | -4.32 | 1.58 | 1% DIO         | CB  | SC | 26.75 | 0.69 | 71.5  | 13.23 | s58 |
| PBT1-C          | ICBA                 | ITIC-2Cl      | -5.70 | -4.14 | 1.56 | DIO            | CF  | SC | 19.69 | 0.91 | 77.1  | 13.41 | s59 |
| PTB7-Th         | PC <sub>71</sub> BM  | 3TT-FIC       | -5.42 | -4.17 | 1.25 | DIO            | CB  | SC | 27.73 | 0.66 | 73.0  | 13.54 | s60 |
| PT3             | meta-<br>TrBRCN      | TCPTC         | -5.50 | -3.92 | 1.58 | 0.5%<br>DIO    | CB  | SC | 20.16 | 0.88 | 76.3  | 13.63 | s61 |
| PM6             | PC <sub>61</sub> BM  | ITIC          | -6.10 | 4.0   | 2.10 | 0.5%<br>DIO    | CB  | SC | 12.37 | 0.93 | 64.3  | 13.88 | s62 |
| PM-6            | MeIC                 | ITCPTC        | -5.62 | -3.96 | 1.66 | 0.25%<br>DIO   | CF  | SC | 18.42 | 0.98 | 78.2  | 14.13 | s63 |
| PBTA-PS         | LA1                  | 6TIC          | -5.45 | -3.94 | 1.51 |                | CB  | SC | 22.33 | 0.84 | 75.9  | 14.24 | s64 |
| PBDB-T:IPIC-4Cl | PC <sub>71</sub> BM  | IPIC-4Cl      | -5.51 | -3.95 | 1.56 | 0.5%<br>DIO    | CB  | SC | 23.3  | 0.82 | 74.6  | 14.3  | s65 |
| ZnP-TBO         | 6TIC                 | 4TIC          | -5.46 | -4.06 | 1.4  | 0.3%<br>DIO    | CB  | SC | 24.58 | 0.80 | 74.9  | 14.73 | s66 |
| PM7             | ITC-2Cl              | IXIC-4Cl      | -5.52 | -4.13 | 1.39 | 0.25%<br>DIO   | CF  | SC | 23.99 | 0.85 | 74.7  | 15.37 | s67 |
| PM6             | M36                  | ITCC-M        | -5.53 | -3.69 | 1.84 | 0.5% 1-<br>CN  | CF  | SC | 23.6  | 0.88 | 72.1  | 15.8  | s68 |
| PM6             | Y7                   | ITIC-M        | -5.58 | -3.98 | 1.6  | 0.5% 1-<br>CN  | CB  | SC | 30.16 | 0.87 | 67.5  | 17.73 | s69 |
| PM6             | BTP-eC9              | ITIC-Th       | -5.66 | -3.93 |      | DIO            | CB  | SC | 28.0  | 0.87 | 77.0  | 18.7  | s70 |
| <b>ITM</b>      |                      |               |       |       |      |                |     |    |       |      |       |       |     |
| PBDB-T          | PC <sub>71</sub> BM  | IT-M          | -5.58 | -3.98 | 1.6  | 0.5%           | CB  | SC | 16.59 | 0.92 | 67.58 | 10.16 | s7  |



**Table S3.** Characteristics of the devices used in Y6 derivatives-based TOSCs and optoelectronic properties of small molecule acceptors (HOMO, LUMO, and  $E_g$  for A2).

| D1               | A1                  | A2            | HOMO<br>(eV) | LUMO<br>(eV) | $E_g$<br>(eV) | Additive<br>(%) | Coating<br>Solvent | Coating<br>method | $J_{sc}$<br>(mA<br>$cm^{-2}$ ) | $V_{oc}$<br>(V) | FF<br>(%) | PCE<br>(%) | Ref  |
|------------------|---------------------|---------------|--------------|--------------|---------------|-----------------|--------------------|-------------------|--------------------------------|-----------------|-----------|------------|------|
| P3HT             | NC70BA              | ZY-4Cl        | -5.61        | -3.67        | 1.94          |                 | CF                 | SC                | 17.98                          | 0.87            | 66.07     | 10.53      | s78  |
| PCE10            | YF-CN               | Y6            | -5.74        | -4.02        | 1.72          |                 | CF                 | SC                | 27.92                          | 0.68            | 63.11     | 12.03      | s79  |
| PBDB-T           | ITCC                | Y1            | -5.47        | -3.95        | 1.52          | 0.9% CN         | CB                 | SC                | 21.5                           | 0.93            | 67.8      | 13.1       | s80  |
| C2               | DBTBT-IC            | AQx-3         | -5.68        | -3.93        | 1.75          |                 | CF                 | SC                | 23.95                          | 0.84            | 72.0      | 14.49      | s81  |
| PBDTNS-<br>BDD   | PC <sub>71</sub> BM | Y6            | -5.65        | -4.10        | 1.55          |                 | CF                 | SC                | 24.7                           | 0.81            | 74.4      | 14.88      | s82  |
| PBDB-T-<br>2Cl   | MF1                 | BP-4F         | -5.68        | -3.88        | 1.8           |                 | CF                 | SC                | 22.02                          | 0.89            | 78.05     | 15.31      | s83  |
| PM6              | DTY6                | Y-Me          | -5.52        | -3.70        | 1.82          | 0.5% CN         | CF-O-Xy            | SC                | 24.2                           | 0.87            | 74.0      | 15.7       | s84  |
| PM6              | PC <sub>71</sub> BM | BTCT-<br>2Cl  | -5.56        | -3.95        | 1.61          | 0.5%<br>DIO     | CF                 | SC                | 25.1                           | 0.88            | 72.6      | 16.1       | s85  |
| PBDB-T-<br>SF    | ITCT                | Y6            | -5.62        | -4.11        | 1.51          | 0.5% CN         | CF                 | SC                | 24.75                          | 0.88            | 73.67     | 16.14      | s86  |
| PM6              | BTO                 | Y6            | -5.61        | -3.98        | 1.63          |                 | paraxylene         | SC                | 25.91                          | 0.86            | 73.41     | 16.39      | s87  |
| PM6              | Y6                  | L8BO-<br>2O   | -5.58        | -3.91        | 1.67          | 0.6% CN         | CB                 | SC                | 25.21                          | 0.85            | 76.66     | 16.4       | s88  |
| PFBDT-<br>8ttTPD | PC <sub>71</sub> BM | Y6            | -5.65        | -4.29        | 1.36          |                 | CF                 | SC                | 25.96                          | 0.85            | 74.0      | 16.43      | s89  |
| P106             | DBTBTIC             | Y18-<br>DMO   | -5.63        | -3.93        | 1.7           |                 | CF                 | SC                | 24.82                          | 0.91            | 73.0      | 16.49      | s90  |
| PM6              | IDIC                | Y6            | -5.62        | -4.11        | 1.51          |                 | CB                 | SC                | 25.39                          | 0.86            | 74.92     | 16.51      | s91  |
| PBDB-TF          | PC <sub>61</sub> BM | Y6            | -5.65        | -4.10        | 1.55          | 0.8% CN         | CF                 | SC                | 25.4                           | 0.84            | 77.0      | 16.5       | s92  |
| PM6              | Y-TNF               | Y-TN          | -5.46        | -3.86        | 1.6           | 0.25%<br>DIO    | CF                 | SC                | 25.84                          | 0.85            | 75.10     | 16.63      | s93  |
| PM6              | PC <sub>71</sub> BM | Y6            | -5.70        | -4.10        | 1.6           | 0.5% CN         | CF                 | SC                | 25.70                          | 0.85            | 76.35     | 16.67      | s94  |
| PTQ10            | PC <sub>71</sub> BM | Y6            | -5.65        | -4.10        | 1.55          |                 | CF                 | SC                | 25.32                          | 0.85            | 74.69     | 16.07      | s95  |
| PM6              | Y-TNF               | Y-TN          | -5.54        | -3.97        | 1.57          | 0.25%<br>DIO    | CF                 | SC                | 25.84                          | 0.85            | 75.10     | 16.63      | s93  |
| PM6              | PC <sub>71</sub> BM | Y6            | -5.62        | -4.11        | 1.51          | 0.75%<br>CN     | CF                 | SC                | 25.5                           | 0.85            | 76.9      | 16.7       | s96  |
| PM6              | FBTIC               | Y6            | -5.65        | -4.10        | 1.55          | 0.5% CN         | CF                 | SC                | 24.6                           | 0.86            | 77.9      | 16.7       | s97  |
| PBDB-TF          | DTNIF               | Y6            | -5.65        | -4.10        | 1.55          | 0.5% CN         | CF                 | SC                | 26.40                          | 0.85            | 73.80     | 16.73      | s98  |
| PM6              | PC <sub>71</sub> BM | Y6            | -5.62        | -4.11        | 1.51          | 0.5% CN         | CF                 | SC                | 25.1                           | 0.86            | 77.2      | 16.7       | s99  |
| PM6              | DIBC                | Y6            | -5.65        | -4.10        | 1.55          |                 | CF                 | SC                | 27.02                          | 0.83            | 76.32     | 16.81      | s100 |
| PM6              | DRCN5T              | BTP-4Cl       | -5.67        | -4.13        | 1.54          | 1.75%<br>CN     | CB                 | SC                | 25.85                          | 0.87            | 74.41     | 16.83      | s101 |
| PM6              | SR197               | Y6            | -5.65        | -4.10        | 1.55          | 0.5% CN         | CF                 | SC                | 26.87                          | 0.83            | 75.08     | 16.83      | s102 |
| PM6              | Y6                  | TF1           | -5.38        | -3.92        | 1.46          | 0.5             | CF                 | SC                | 26.12                          | 0.87            | 76.21     | 16.91      | s103 |
| PBDB-TF          | Y6                  | APDC-<br>TPDA | -5.65        | -4.10        | 1.55          | 4% CN           | CB                 | SC                | 25.98                          | 0.84            | 77.50     | 16.96      | s104 |
| PM6              | BTP-M               | Y6            | -5.65        | -4.00        | 1.65          | 0.5% CN         | CF                 | SC                | 26.56                          | 0.87            | 73.46     | 17.03      | s105 |
| PM6              | PC <sub>71</sub> BM | CH1007        | -5.59        | -3.97        | 1.62          | 0.5% CN         | CF                 | SC                | 27.48                          | 0.82            | 75.61     | 17.08      | s106 |
| PM6              | ABP6T-4F            | CH1007        | -5.63        | -3.96        | 1.64          | 0.5% CN         | CF                 | SC                | 26.52                          | 0.85            | 75.87     | 17.10      | s107 |
| PM6              | BTP-PIO             | Y6            | -5.65        | -4.10        |               |                 | CF                 | SC                | 27.31                          | 0.84            | 73.9      | 17.10      | s108 |
| PM6              | DRTB-T-<br>C4       | Y6            | -5.71        | -4.34        | 1.37          | 0.5% CN         | CF                 | SC                | 24.79                          | 0.85            | 81.3      | 17.13      | s109 |
| PM6:             | L8-BO-F             | BTP-eC9       |              |              |               | 0.5% CN         | CN                 | LBL               | 28.36                          | 0.83            | 73.0      | 17.31      | s110 |

|         |            |                                      |       |       |      |               |        |    |       |       |       |       |      |
|---------|------------|--------------------------------------|-------|-------|------|---------------|--------|----|-------|-------|-------|-------|------|
| PM6     | IDT-T-PCN  | Y6                                   | -5.60 | -4.10 | 1.5  | CN            | CF     | SC | 26.56 | 0.85  | 76.1  | 17.36 | s31  |
| PM6     | ITCPTC     | Y6                                   | -5.60 | -4.10 | 1.5  | 0.5% CN       | CF     | SC | 25.67 | 0.86  | 78.8  | 17.42 | s111 |
| PM6     | Y6         | F6D                                  | -5.61 | -4.16 | 1.45 | 1%- CN        | CF     | SC | 26.95 | 0.86  | 75.44 | 17.52 | s112 |
| PM6     | Y6         | BTP-CC                               | -5.50 | -3.68 | 1.82 | 0.5%CN        | CF     | SC | 26.98 | 0.84  | 76.98 | 17.55 | s113 |
| PTQ10   | BTP-Ph     | BTP-Th                               | -5.60 | -3.78 | 1.82 | 0.75%<br>CN   | CF     | SC | 25.2  | 0.88  | 78.6  | 17.6  | s114 |
| PM6     | PY-IT      | L8-BO                                |       |       |      |               | CF     | SC | 24.45 | 0.95  | 76.38 | 17.74 | s115 |
| D18     | BTP-Ec9-4f | SM16                                 | -5.67 | -3.93 | 1.74 |               | CF     | SC | 27.26 | 0.88  | 75.16 | 18.20 | s116 |
| PM6     | S9         | S1                                   |       |       |      |               | CF     | SC | 26.77 | 0.89  | 76.66 | 18.29 | s117 |
| D18     | N3         | Qx-p-C <sub>7</sub> H <sub>8</sub> O | -5.66 | -3.91 | 1.75 |               | CF     | SC | 27.85 | 0.87  | 75.88 | 18.49 | s118 |
| PM6     | BTP-eC9    | BTP-F                                | -5.59 | -3.86 | 1.73 |               |        |    | 26.99 | 0.85  | 79.0  | 18.45 | s119 |
| PM6     | BTP-eC9    | QX-Ac                                | -5.54 | -3.78 | 1.76 |               | CF:CB  | SC | 26.69 | 0.87  | 79.35 | 18.51 | s120 |
| PM6     | BO-5Cl     | BO-4Cl                               | -5.68 | -3.94 | 1.74 | 0.3%<br>DIO   | CF     | SC | 26.93 | 0.87  | 78.0  | 18.56 | s121 |
| PM6     | N3         | Norb-Y                               | -5.63 | -3.63 | 2.0  | DBCl          | CF     | SC | 27.64 | 0.86  | 77.96 | 18.59 | s122 |
| PM6     | L8-BO-F    | BTP-eC9                              | -5.59 | -3.98 | 1.61 | 0.5%<br>DIO   | CF     | SC | 27.35 | 0.85  | 80.0  | 18.66 | s123 |
| PM6     | BTP-eC9    | Y6-10                                | -5.75 | -3.71 | 2.04 | 0.5%<br>DIO   | CF     | SC | 28.06 | 0.85  | 26.97 | 18.81 | s124 |
| PM6     | ThMeCl-2   | C5-16                                | -5.69 | -4.03 | 1.66 | 0.25%<br>DIO  | CF     | SC | 27.8  | 0.86  | 79.3  | 18.9  | s125 |
| PBQx-TF | F-BTA3     | ec9-2Cl                              | -5.57 | -3.74 | 1.83 | 0.5%<br>DIO   | Tol    | SC | 26.8  | 0.87  | 79.0  | 18.7  | s126 |
| PM6     | L8-BO      | Cl-QTP-4F                            | -5.66 | -3.72 | 1.94 | 0.4%<br>DIM   | CF     | SC | 26.86 | 0.88  | 79.5  | 19.0  | s127 |
| PM6     | Z2         | L8-BO                                | -5.73 | -3.94 | 1.79 | 0.25%<br>DIO  | CF     | SC | 26.79 | 0.90  | 78.87 | 19.02 | s128 |
| PM6     | BTP-ec9    | Y-LC                                 | -5.76 | -3.77 |      | DBCb          | CF     | SC | 28.51 | 0.85  | 78.2  | 19.10 | s129 |
| PM6     | Z3         | L8-BO                                | -5.73 | -3.94 | 1.79 | 0.25%<br>DIO  | CF     | SC | 26.79 | 0.90  | 78.87 | 19.02 | s128 |
| PM6     | L8-BO      | BTP-ThMeCl                           | -5.64 | -3.81 | 1.83 | 0.25 %<br>DIO | CF     | SC | 26.7  | 0.87  | 82.0  | 19.10 | s130 |
| LWPM6   | Y6         | TYT-S                                | -5.71 | -4.01 | 1.70 |               | CF     | SC | 28.63 | 0.85  | 79.12 | 19.23 | s131 |
| PM6     | L8-BO      | QEIP-4Cl                             | -5.73 | -3.94 | 1.79 | 0.25 %<br>DIO | CF     | SC | 27.24 | 0.89  | 79.07 | 19.27 | s132 |
| PY5     | PNDIT-F3N  | L8-BO                                | -5.67 | -3.92 | 1.75 | 0.3%<br>DIO   | CF     | SC | 27.08 | 0.91  | 78.72 | 19.40 | s133 |
| D18     | L8-BO      | 2T-BO-2                              | -5.61 | -3.70 | 1.91 | DIO           | CF     | SC | 26.15 | 0.92  | 80.49 | 19.37 | s134 |
| PM6     | N3         | YIS-6F                               | -5.70 | -3.96 | 1.40 | DBCL          | CF     | SC | 28.4  | 0.86  | 79.1  | 19.43 | s135 |
| PM6     | oPhFO      | BTP-ec9                              | -5.71 | -3.92 | 1.79 |               | CB     | SC | 27.6  | 0.878 | 80.6  | 19.5  | s136 |
| PM6     | L8-BO      | BTP-OS                               | -5.68 | -3.91 | 1.77 | 0.25%<br>DIO  | CF     | SC | 27.77 | 0.901 | 78.82 | 19.72 | s137 |
| PM6     | L8-BO      | ZY-4Cl                               | -5.64 | -3.67 | 1.97 |               | CF     | SC | 27.51 | 0.908 | 79.67 | 19.90 | s138 |
| PM6     | BTP-eC9    | YQX-10                               | -5.8  | -4.37 | 1.43 | 0.5%<br>DIO   | CF     | SC | 29.25 | 0.864 | 79.05 | 20.0  | s139 |
| PM6     | PY-IT      | AQI4                                 |       |       |      | DIB           | CB:OXY | SC | 26.6  | 0.94  | 80.1  | 20.1  | s140 |
| PM6     | L8-BO      | C9-1F                                | -5.62 | -3.89 | 1.73 | DIB           | CF     | SC | 26.96 | 0.92  | 81.18 | 20.16 | s141 |
| D18     | L8-BO      | BQx-O                                | -5.72 | -3.66 | 2.06 |               | CF     | SC | 26.77 | 0.932 | 80.59 | 20.11 | s142 |
| PM6     | BTP-eC9    | QD-1                                 | -5.73 | -3.80 | 1.93 | 0.3%<br>DIO   | CF     | SC | 28.98 | 0.873 | 79.82 | 20.19 | s143 |
| PM6     | L8-BO      | Z-Tri                                | -5.69 | -3.88 | 1.81 | DBCl          | CF     | SC | 27.30 | 0.927 | 80.3  | 20.32 | s144 |
| PM6     | PBTI-FR    | L8-BO                                | -5.67 | -3.97 | 1.7  | 0.25%<br>DIO  | SF     | SC | 28.07 | 0.89  | 82.55 | 20.52 | s145 |

1,3-dibromo-5-chlorobenzene (DBCb)

## References

- S1. W. Gu, L. Yang, Y. Chen, X. Wang, H. Zhang, J. Hou, Z. Zhu and H. Huang, *Dyes Pigm*, 2017, **141**, 388-393.
- S2. M. E. Farahat, A. Laventure, M. A. Anderson, M. Mainville, F. Tintori, M. Leclerc, E. L. Ratcliff and G. C. Welch, *ACS Appl. Mater. Interfaces*, 2020, **12**, 43684-43693.
- S3. J. Wang, J. Peng, X. Liu and Z. Liang, *ACS Appl. Mater. Interfaces*, 2017, **9**, 20704-20710.
- S4. K. Weng, C. Li, P. Bi, H. S. Ryu, Y. Guo, X. Hao, D. Zhao, W. Li, H. Y. Woo and Y. Sun, *J. Mater. Chem. A*, 2019, **7**, 3552-3557.
- S5. R. Qin, D. Guo, M. Li, G. Li, Z. Bo and J. Wu, *ACS Appl. Energy Mater*, 2019, **2**, 305-311.
- S6. P. Cheng, M. Zhang, T.-K. Lau, Y. Wu, B. Jia, J. Wang, C. Yan, M. Qin, X. Lu and X. Zhan, *Adv. Mater*, 2017, **29**, 1605216.
- S7. T. Liu, Y. Guo, Y. Yi, L. Huo, X. Xue, X. Sun, H. Fu, W. Xiong, D. Meng, Z. Wang, F. Liu, T. P. Russell and Y. Sun, *Adv. Mater*, 2016, **28**, 10008-10015.
- S8. Y. Chen, P. Ye, Z.-G. Zhu, X. Wang, L. Yang, X. Xu, X. Wu, T. Dong, H. Zhang, J. Hou, F. Liu and H. Huang, *Adv. Mater*, 2017, **29**, 1603154.
- S9. M. Liu, X. Ge, X. Jiang, F. Guo, S. Gao, Q. Peng, L. Zhao and Y. Zhang, *Adv. Funct. Mater*, 2023, **33**, 2300214.
- S10. B. Fan, W. Zhong, X.-F. Jiang, Q. Yin, L. Ying, F. Huang and Y. Cao, *Adv. Energy Mater*, 2017, **7**, 1602127.
- S11. W. Zhong, J. Cui, B. Fan, L. Ying, Y. Wang, X. Wang, G. Zhang, X.-F. Jiang, F. Huang and Y. Cao, *Chem. Mater*, 2017, **29**, 8177-8186.
- S12. L. Krishnan Jagadamma, R. G. D. Taylor, Alexander L. Kanibolotsky, M. T. Sajjad, I. A. Wright, P. N. Horton, S. J. Coles, I. D. W. Samuel and P. J. Skabara, *Sustain. Energy Fuels*, 2019, **3**, 2087-2099.
- S13. M. Kim, J. Lee, D. H. Sin, H. Lee, H. Y. Woo and K. Cho, *ACS Appl. Mater. Interfaces*, 2018, **10**, 25570-25579.
- S14. P. Yin, L. Wang, J. Liang, Y. Yu, L. Chen, C. Weng, C. Cui and P. Shen, *J. Mater. Chem. C*, 2020, **8**, 11223-11238.
- S15. Y.-Q.-Q. Yi, H. Feng, X. Ke, J. Yan, M. Chang, X. Wan, C. Li and Y. Chen, *J. Mater. Chem. C*, 2019, **7**, 4013-4019.
- S16. C. e. Zhang, S. Feng, Y. Liu, S. Ming, H. Lu, D. Ma, X. Xu, Y. Wu and Z. Bo, *J. Mater. Chem. A*, 2018, **6**, 6854-6859.
- S17. D. Baran, R. S. Ashraf, D. A. Hanifi, M. Abdelsamie, N. Gasparini, J. A. Röhr, S. Holliday, A. Wadsworth, S. Lockett, M. Neophytou, C. J. M. Emmott, J. Nelson, C. J. Brabec, A. Amassian, A. Salleo, T. Kirchartz, J. R. Durrant and I. McCulloch, *Nat. Mater*, 2017, **16**, 363-369.
- S18. S. Oh, C. E. Song, T. Lee, A. Cho, H. K. Lee, J.-C. Lee, S.-J. Moon, E. Lim, S. K. Lee and W. S. Shin, *J. Mater. Chem. A*, 2019, **7**, 22044-22053.
- S19. M. Zhang, W. Gao, F. Zhang, Y. Mi, W. Wang, Q. An, J. Wang, X. Ma, J. Miao, Z. Hu, X. Liu, J. Zhang and C. Yang, *Energy Environ. Sci*, 2018, **11**, 841-849.
- S20. P. Xue, Y. Xiao, T. Li, S. Dai, B. Jia, K. Liu, J. Wang, X. Lu, R. P. S. Han and X. Zhan, *J. Mater. Chem. A*, 2018, **6**, 24210-24215.

- S21. T. Lee, S. Oh, S. Rasool, C. E. Song, D. Kim, S. K. Lee, W. S. Shin and E. Lim, *J. Mater. Chem. A*, 2020, **8**, 10318-10330.
- S22. L. Xiao, B. He, Q. Hu, L. Maserati, Y. Zhao, B. Yang, M. A. Kolaczowski, C. L. Anderson, N. J. Borys, L. M. Klivansky, T. L. Chen, A. M. Schwartzberg, T. P. Russell, Y. Cao, X. Peng and Y. Liu, *Joule*, 2018, **2**, 2154-2166.
- S23. J. Lv, Y. Feng, J. Fu, J. Gao, R. Singh, M. Kumar, M. Kim, H. Tang, S. Lu, W. Zhang, I. McCulloch, J. Li and Z. Kan, *Sol. RRL*, 2020, **4**, 1900403.
- S24. C. e. Zhang, S. Ming, H. Wu, X. Wang, H. Huang, W. Xue, X. Xu, Z. Tang, W. Ma and Z. Bo, *J. Mater. Chem. A*, 2020, **8**, 22907-22917.
- S25. H. Huang, X. Li, S. Chen, B. Qiu, J. Du, L. Meng, Z. Zhang, C. Yang and Y. Li, *J. Mater. Chem. A*, 2019, **7**, 27423-27431.
- S26. C. e. Zhang, P. Jiang, X. Zhou, S. Feng, Z. Bi, X. Xu, C. Li, Z. Tang, W. Ma and Z. Bo, *ACS Appl. Mater. Interfaces*, 2020, **12**, 40590-40598.
- S27. H. Wang, Z. Zhang, X. Liu, S. Qu, S. Guang, Z. Ye, J. Yu and W. Tang, *J. Chem. Eng*, 2021, **413**, 127444.
- S28. Y. Dong, Y. Zou, J. Yuan, H. Yang, Y. Wu, C. Cui and Y. Li, *Adv. Mater*, 2019, **31**, 1904601.
- S29. N. Gasparini, S. H. K. Paleti, J. Bertrandie, G. Cai, G. Zhang, A. Wadsworth, X. Lu, H.-L. Yip, I. McCulloch and D. Baran, *ACS Energy Lett.*, 2020, **5**, 1371-1379.
- S30. K. Wang, J. Gao, H. Wang, Q. Guo, J. Zhang, X. Guo and M. Zhang, *ChemSusChem*, 2024, **17**, e202400691.
- S31. X. Tang, X. Peng, H. Liao, X. Zeng, X. Zhang, Y. Zhu, C. Weng and P. Shen, *ACS Appl. Energy Mater*, 2025, **8**, 13741-13751.
- S32. C. Zhang, X. Zhong, X. Sun, Y. Wei, H. Wang, F. Wang, Y. Ji, X. Ding, J. Lv, S. Pang, H. Hu, K. Wang and M. Xiao, *Chem. Eng. J*, 2025, **504**, 158530.
- S33. Y. Cho, T. L. Nguyen, H. Oh, K. Y. Ryu, H. Y. Woo and K. Kim, *ACS Appl. Mater. Interfaces*, 2018, **10**, 27757-27763.
- S34. H. Hwang, D. H. Sin, C. Park and K. Cho, *Sci Rep*, 2019, **9**, 12081.
- S35. N. Y. Doumon, F. V. Houard, J. Dong, P. Christodoulis, M. V. Dryzhov, G. Portale and L. J. A. Koster, *J. Mater. Chem. C*, 2019, **7**, 5104-5111.
- S36. V. Tamilavan, Y. Liu, J. Lee, I. Shin, Y. K. Jung, B. R. Lee, J. H. Jeong and S. H. Park, *ACS Appl. Energy Mater*, 2019, **2**, 4284-4291.
- S37. T. Kim, J. Heo, J. Y. Lee, Y. J. Yoon, T. H. Lee, Y. S. Shin, I.-S. Kim, H. Kim, M. S. Jeong, I.-W. Hwang, B. Walker, P. S. Jo, B. Lim and J. Y. Kim, *ACS Appl. Mater. Interfaces*, 2019, **11**, 7208-7215.
- S38. J. Mai, Y. Xiao, G. Zhou, J. Wang, J. Zhu, N. Zhao, X. Zhan and X. Lu, *Adv. Mater*, 2018, **30**, 1802888.
- S39. L. Yang, W. Gu, L. Hong, Y. Mi, F. Liu, M. Liu, Y. Yang, B. Sharma, X. Liu and H. Huang, *ACS Appl. Mater. Interfaces*, 2017, **9**, 26928-26936.
- S40. S. Yu, Q. Yang, W. Yu, J. Zhang, J. Liu, S. Jin, X. Guo and C. Li, *Chem. Mater*, 2019, **31**, 7650-7656.
- S41. K. Kranthiraja, U. K. Aryal, V. G. Sree, K. Gunasekar, C. Lee, M. Kim, B. J. Kim, M. Song and S.-H. Jin, *ACS Appl. Mater. Interfaces*, 2018, **10**, 13748-13756.

- S42. M. Saito, Y. Tamai, H. Ichikawa, H. Yoshida, D. Yokoyama, H. Ohkita and I. Osaka, *Macromolecules*, 2020, **53**, 10623-10635.
- S43. H. Liu, J. Li, L. Xia, Y. Bai, S. Hu, J. Liu, L. Liu, T. Hayat, A. Alsaedi and Z. Tan, *ACS Appl. Mater. Interfaces*, 2018, **10**, 29831-29839.
- S44. H. Lu, J. Zhang, J. Chen, Q. Liu, X. Gong, S. Feng, X. Xu, W. Ma and Z. Bo, *Adv. Mater.*, 2016, **28**, 9559-9566.
- S45. T. Liu, X. Xue, L. Huo, X. Sun, Q. An, F. Zhang, T. P. Russell, F. Liu and Y. Sun, *Chem. Mater.*, 2017, **29**, 2914-2920.
- S46. R. Lv, D. Chen, X. Liao, L. Chen and Y. Chen, *Adv. Funct. Mater.*, 2019, **29**, 1805872.
- S47. X. Li, X. Du, H. Lin, X. Kong, L. Li, L. Zhou, C. Zheng and S. Tao, *ACS Appl. Mater. Interfaces*, 2019, **11**, 15598-15606.
- S48. H. Gu, L. Yan, Z. Li, J. Zhang, Q. Luo, Y. Yang, X. Liu, Z. Wei and C.-Q. Ma, *Sol. RRL*, 2020, **4**, 2000374.
- S49. T. Zhang, X. Zhao, D. Yang, Y. Tian and X. Yang, *Adv. Energy Mater.*, 2018, **8**, 1701691.
- S50. D. Huang, F. Bian, D. Zhu, X. Bao, C. Hong, P. Zhou, Y. Huang and C. Yang, *J. Phys. Chem. C*, 2019, **123**, 14976-14984.
- S51. C. Xue, T. Zhang, K. Ma, P. Wan, L. Hong, B. Xu and C. An, *Macromol. Rapid Commun.*, 2019, **40**, 1900246.
- S52. Z. Hu, F. Zhang, Q. An, M. Zhang, X. Ma, J. Wang, J. Zhang and J. Wang, *ACS Energy Lett*, 2018, **3**, 555-561.
- S53. P. Cheng, J. Wang, Q. Zhang, W. Huang, J. Zhu, R. Wang, S.-Y. Chang, P. Sun, L. Meng, H. Zhao, H.-W. Cheng, T. Huang, Y. Liu, C. Wang, C. Zhu, W. You, X. Zhan and Y. Yang, *Adv. Mater.*, 2018, **30**, 1801501.
- S54. J. Wang, W. Gao, Q. An, M. Zhang, X. Ma, Z. Hu, J. Zhang, C. Yang and F. Zhang, *J. Mater. Chem. A*, 2018, **6**, 11751-11758.
- S55. X. Liao, Y. Cui, X. Shi, Z. Yao, H. Zhao, Y. An, P. Zhu, Y. Guo, X. Fei, L. Zuo, K. Gao, F. Lin, Q. Xie, L. Chen, W. Ma, Y. Chen and A. K. Y. Jen, *Mater. Chem. Front*, 2020, **4**, 1507-1518.
- S56. Z. Liu and N. Wang, *J. Mater. Chem. C*, 2019, **7**, 10039-10048.
- S57. W. T. Hadmojo, F. T. A. Wibowo, W. Lee, H.-K. Jang, Y. Kim, S. Sinaga, M. Park, S.-Y. Ju, D. Y. Ryu, I. H. Jung and S.-Y. Jang, *Adv. Funct. Mater.*, 2019, **29**, 1808731.
- S58. C. Yang, Y. Sun, Q. Li, K. Liu, X. Xue, Y. Huang, K. Ren, L. Li, Y. Chen, Z. Wang, S. Qu and Z. Wang, *J. Phys. Chem. Lett*, 2020, **11**, 927-934.
- S59. Y. Xie, F. Yang, Y. Li, M. A. Uddin, P. Bi, B. Fan, Y. Cai, X. Hao, H. Y. Woo, W. Li, F. Liu and Y. Sun, *Adv. Mater.*, 2018, **30**, 1803045.
- S60. H.-H. Gao, Y. Sun, X. Wan, X. Ke, H. Feng, B. Kan, Y. Wang, Y. Zhang, C. Li and Y. Chen, *Adv. Sci*, 2018, **5**, 1800307.
- S61. X. Xu, Z. Bi, W. Ma, G. Zhang, H. Yan, Y. Li and Q. Peng, *J. Mater. Chem. A*, 2019, **7**, 14199-14208.
- S62. J. Li, S. Wu, P. Peng, F. Zhao, Z. Li, M. Wang and Z. Ma, *ACS Appl. Electron. Mater.*, 2025, **7**, 7216-7225.
- S63. T. Liu, Z. Luo, Q. Fan, G. Zhang, L. Zhang, W. Gao, X. Guo, W. Ma, M. Zhang, C. Yang, Y. Li and H. Yan, *Energy Environ. Sci*, 2018, **11**, 3275-3282.

- S64. H. Jiang, X. Li, J. Wang, S. Qiao, Y. Zhang, N. Zheng, W. Chen, Y. Li and R. Yang, *Adv. Funct. Mater.*, 2019, **29**, 1903596.
- S65. R. Geng, X. Song, H. Feng, J. Yu, M. Zhang, N. Gasparini, Z. Zhang, F. Liu, D. Baran and W. Tang, *ACS Energy Lett.*, 2019, **4**, 763-770.
- S66. L. Nian, Y. Kan, K. Gao, M. Zhang, N. Li, G. Zhou, S. B. Jo, X. Shi, F. Lin, Q. Rong, F. Liu, G. Zhou and A. K. Y. Jen, *Joule*, 2020, **4**, 2223-2236.
- S67. T. Liu, Z. Luo, Y. Chen, T. Yang, Y. Xiao, G. Zhang, R. Ma, X. Lu, C. Zhan, M. Zhang, C. Yang, Y. Li, J. Yao and H. Yan, *Energy Environ. Sci.*, 2019, **12**, 2529-2536.
- S68. B. Du, Y. Ma, C. Guo, J. Cai, D. Li, S. Cheng, D. Liu, Q. Zheng and T. Wang, *Adv. Funct. Mater.*, 2021, **31**, 2105794.
- S69. A. A. Torimtubun, M. Méndez, E. Moustafa, J. Pallarès, E. Palomares and L. F. Marsal, *Sol. RRL*, 2023, **7**, 2300228.
- S70. T. Huang, Z. Zhang, D. Wang, Y. Zhang, Z. Deng, Y. Huang, Q. Liao and J. Zhang, *ACS Appl. Energy Mater.*, 2023, **6**, 3126-3134.
- S71. Z. Chen, H. Chen, C. Feng, X. Wang, Z. He and Y. Cao, *J. Mater. Chem. C*, 2021, **9**, 7658-7664.
- S72. W. Jiang, R. Yu, Z. Liu, R. Peng, D. Mi, L. Hong, Q. Wei, J. Hou, Y. Kuang and Z. Ge, *Adv. Mater.*, 2018, **30**, 1703005.
- S73. W. Zhao, S. Li, S. Zhang, X. Liu and J. Hou, *Advanced Materials*, 2017, **29**, 1604059.
- S74. Z. Liang, J. Tong, H. Li, Y. Wang, N. Wang, J. Li, C. Yang and Y. Xia, *J. Mater. Chem. A*, 2019, **7**, 15841-15850.
- S75. A. Zeng, M. Pan, B. Lin, T.-K. Lau, M. Qin, K. Li, W. Ma, X. Lu, C. Zhan and H. Yan, *Sol. RRL*, 2020, **4**, 1900353.
- S76. D. Yan, J. Xin, W. Li, S. Liu, H. Wu, W. Ma, J. Yao and C. Zhan, *ACS Appl. Mater. Interfaces*, 2019, **11**, 766-773.
- S77. B. Du, R. Geng, W. Li, D. Li, Y. Mao, M. Chen, X. Zhang, J. A. Smith, R. C. Kilbride, M. E. O'Kane, D. Liu, D. G. Lidzey, W. Tang and T. Wang, *ACS Energy Lett.*, 2019, **4**, 2378-2385.
- S78. Z. Liu, *ACS Appl. Energy Mater.*, 2025, **8**, 11149-11157.
- S79. W. Liang, P. Liu, Y. Zhang, W. Zhu, X. Tao, Z. He and Y. Li, *Mater. Adv.*, 2022, **3**, 1759-1766.
- S80. H.-W. Cheng, H. Zhang, Y.-C. Lin, N.-Z. She, R. Wang, C.-H. Chen, J. Yuan, C.-S. Tsao, A. Yabushita, Y. Zou, F. Gao, P. Cheng, K.-H. Wei and Y. Yang, *Nano Lett.*, 2019, **19**, 5053-5061.
- S81. G. D. Sharma, A. Agrawal, R. Pradhan, M. L. Keshtov, R. Singhal, W. Liu, X. Zhu and A. Mishra, *ACS Appl. Energy Mater.*, 2021, **4**, 11537-11544.
- S82. X. Liu, Z. Liang, S. Du, J. Tong, J. Li, R. Zhang, X. Shi, L. Yan, X. Bao and Y. Xia, *ACS Appl. Energy Mater.*, 2021, **4**, 1774-1783.
- S83. J. Gao, W. Gao, X. Ma, Z. Hu, C. Xu, X. Wang, Q. An, C. Yang, X. Zhang and F. Zhang, *Energy Environ. Sci.*, 2020, **13**, 958-967.
- S84. P. Fürk, D. Paarhammer, I. Klimenkova, A. Savkins, K. Berzins, M. Reinfelds, J. B. Schaubeder, H. Amenitsch, T. Rath and G. Trimmel, *Energy Adv.*, 2023, **2**, 1399-1408.

- S85. X. Li, M.-A. Pan, T.-K. Lau, W. Liu, K. Li, N. Yao, F. Shen, S. Huo, F. Zhang, Y. Wu, X. Li, X. Lu, H. Yan and C. Zhan, *Chem. Mater*, 2020, **32**, 5182-5191.
- S86. Y. Chang, T.-K. Lau, M.-A. Pan, X. Lu, H. Yan and C. Zhan, *Mater. Horiz*, 2019, **6**, 2094-2102.
- S87. H. Chen, R. Zhang, X. Chen, G. Zeng, L. Kobera, S. Abbrent, B. Zhang, W. Chen, G. Xu, J. Oh, S.-H. Kang, S. Chen, C. Yang, J. Brus, J. Hou, F. Gao, Y. Li and Y. Li, *Nat Energy*, 2021, **6**, 1045-1053.
- S88. X. Shen, X. Wang, J. Wang, R. Wang, Y. Li, F. Bi and X. Bao, *J. Mater. Chem. C*, 2024, **12**, 17403-17410.
- S89. J.-W. Ha, C. E. Song, H. S. Kim, D. H. Ryu, W. S. Shin and D.-H. Hwang, *ACS Appl. Mater. Interfaces*, 2020, **12**, 51699-51708.
- S90. M. L. Keshtov, I. O. Konstantinov, S. A. Kuklin, Y. Zou, A. Agrawal, F. C. Chen and G. D. Sharma, *ChemSusChem*, 2021, **14**, 4731-4740.
- S91. K. Li, Y. Wu, Y. Tang, M.-A. Pan, W. Ma, H. Fu, C. Zhan and J. Yao, *Adv. Energy Mater*, 2019, **9**, 1901728.
- S92. R. Yu, H. Yao, Y. Cui, L. Hong, C. He and J. Hou, *Adv. Mater*, 2019, **31**, 1902302.
- S93. K. Wang, H. Bai, C. Zhang, C. Sun, S. Sang, Y. Li, Z. Chen, J. n. Hu, X. Li, L. Meng and Y. Li, *Energy Adv*, 2024, **3**, 1948-1955.
- S94. T. Yan, W. Song, J. Huang, R. Peng, L. Huang and Z. Ge, *Adv. Mater*, 2019, **31**, 1902210.
- S95. B. Qiu, S. Chen, C. Sun, J. Yuan, X. Zhang, C. Zhu, S. Qin, L. Meng, Y. Zhang, C. Yang, Y. Zou and Y. Li, *Sol. RRL*, 2020, **4**, 1900540.
- S96. W. Zhang, J. Huang, J. Xu, M. Han, D. Su, N. Wu, C. Zhang, A. Xu and C. Zhan, *Adv. Energy Mater*, 2020, **10**, 2001436.
- S97. G. Cai, Y. Li, J. Zhou, P. Xue, K. Liu, J. Wang, Z. Xie, G. Li, X. Zhan and X. Lu, *ACS Appl. Mater. Interfaces*, 2020, **12**, 50660-50667.
- S98. P. Yin, Z. Yin, Y. Ma and Q. Zheng, *Energy Environ. Sci*, 2020, **13**, 5177-5185.
- S99. M.-A. Pan, T.-K. Lau, Y. Tang, Y.-C. Wu, T. Liu, K. Li, M.-C. Chen, X. Lu, W. Ma and C. Zhan, *J. Mater. Chem. A*, 2019, **7**, 20713-20722.
- S100. X. Lu, L. Cao, X. Du, H. Lin, C. Zheng, Z. Chen, B. Sun and S. Tao, *Adv. Optical Mater*, 2021, **9**, 2100064.
- S101. K.-N. Zhang, J.-J. Guo, L.-J. Zhang, C.-C. Qin, H. Yin, X.-Y. Gao and X.-T. Hao, *Adv. Funct. Mater.*, 2021, **31**, 2100316.
- S102. X. Li, L. Zhou, X. Lu, L. Cao, X. Du, H. Lin, C. Zheng and S. Tao, *Mater. Chem. Front*, 2021, **5**, 3850-3858.
- S103. X. Liao, Q. Xie, Y. Guo, Q. He, Z. Chen, N. Yu, P. Zhu, Y. Cui, Z. Ma, X. Xu, H. Zhu and Y. Chen, *Energy Environ. Sci*, 2022, **15**, 384-394.
- S104. X. Du, Y. Yuan, L. Zhou, H. Lin, C. Zheng, J. Luo, Z. Chen, S. Tao and L.-S. Liao, *Adv. Funct. Mater*, 2020, **30**, 1909837.
- S105. L. Zhan, S. Li, T.-K. Lau, Y. Cui, X. Lu, M. Shi, C.-Z. Li, H. Li, J. Hou and H. Chen, *Energy Environ. Sci*, 2020, **13**, 635-645.
- S106. F. Lin, K. Jiang, W. Kaminsky, Z. Zhu and A. K. Y. Jen, *J. Am. Chem. Soc*, 2020, **142**, 15246-15251.

- S107. W. Gao, B. Fan, F. Qi, F. Lin, R. Sun, X. Xia, J. Gao, C. Zhong, X. Lu, J. Min, F. Zhang, Z. Zhu, J. Luo and A. K.-Y. Jen, *Adv. Funct. Mater.*, 2021, **31**, 2104369.
- S108. T. Xu, X. Zhang, S. Zhang, W. Zhang and W. Song, *ACS Appl. Mater. Interfaces*, 2024, **16**, 4618-4627.
- S109. D. Li, L. Zhu, X. Liu, W. Xiao, J. Yang, R. Ma, L. Ding, F. Liu, C. Duan, M. Fahlman and Q. Bao, *Adv. Mater.*, 2020, **32**, 2002344.
- S110. Y. Cai, Q. Li, G. Lu, H. S. Ryu, Y. Li, H. Jin, Z. Chen, Z. Tang, G. Lu, X. Hao, H. Y. Woo, C. Zhang and Y. Sun, *Nat Commun*, 2022, **13**, 2369.
- S111. R. Ma, T. Liu, Z. Luo, K. Gao, K. Chen, G. Zhang, W. Gao, Y. Xiao, T.-K. Lau, Q. Fan, Y. Chen, L.-K. Ma, H. Sun, G. Cai, T. Yang, X. Lu, E. Wang, C. Yang, A. K. Y. Jen and H. Yan, *ACS Energy Lett*, 2020, **5**, 2711-2720.
- S112. S. Li, Z. He, S. Zhang, Z. Hao and H. Zhong, *ACS Appl. Mater. Interfaces*, 2024, **16**, 46332-46340.
- S113. X. Xu, C. Sun, J. Jing, T. Niu, X. Wu, K. Zhang, F. Huang, Q. Xu, J. Yuan, X. Lu, Y. Zhou and Y. Zou, *ACS Appl. Mater. Interfaces*, 2022, **14**, 36582-36591.
- S114. Y. Chang, J. Zhang, Y. Chen, G. Chai, X. Xu, L. Yu, R. Ma, H. Yu, T. Liu, P. Liu, Q. Peng and H. Yan, *Adv. Energy Mater.*, 2021, **11**, 2100079.
- S115. W. Xu, M. Zhang, Z. Liu, H. Tian, W. Zhang, S. Sun, S. Y. Jeong, F. Zhang, X. Li, Q. Sun, X. Hao, H. Y. Woo, X. Ma and F. Zhang, *J. Mater. Chem. A*, 2024, **12**, 4077-4085.
- S116. H. Lu, G. Ran, Y. Liu, Z. Pei, W. Liu, Y. Liu, Z. Tang, W. Zhang and Z. Bo, *Adv. Funct. Mater.*, 2023, **33**, 2301866.
- S117. X. Xia, L. Mei, R. Sun, S. Li, C.-Y. Chen, J.-M. Lin, J. Min, H. Chen, X.-K. Chen and X. Lu, *Adv. Energy Mater.*, 2024, **14**, 2303785.
- S118. Y. Guo, Z. Chen, J. Ge, J. Zhu, J. Zhang, Y. Meng, Q. Ye, S. Wang, F. Chen, W. Ma and Z. Ge, *Adv. Funct. Mater.*, 2023, **33**, 2305611.
- S119. Y. Li, Y. Cai, Y. Xie, J. Song, H. Wu, Z. Tang, J. Zhang, F. Huang and Y. Sun, *Energy Environ. Sci.*, 2021, **14**, 5009-5016.
- S120. C. H. Kwok, H. M. Ng, C. Gao, H. Hu, T. A. Dela Peña, J. Y. L. Lai, L. Chen, L. Xie, M. Li, J. Wu, G. Zhang, W.-Y. Wong, H. Yan and H. Yu, *J. Mater. Chem. A*, 2025, **13**, 14765-14772.
- S121. C. He, Z. Chen, T. Wang, Z. Shen, Y. Li, J. Zhou, J. Yu, H. Fang, Y. Li, S. Li, X. Lu, W. Ma, F. Gao, Z. Xie, V. Coropceanu, H. Zhu, J.-L. Bredas, L. Zuo and H. Chen, *Nat Commun*, 2022, **13**, 2598.
- S122. W. Xu, J. Fang, D. Xia, Q. Xie, Y. Zhang, Y. Xie, W. Li, L. Jiang and C. Zhao, *ACS Appl. Energy Mater.*, 2024, **7**, 10662-10669.
- S123. Y. Cai, Y. Li, R. Wang, H. Wu, Z. Chen, J. Zhang, Z. Ma, X. Hao, Y. Zhao, C. Zhang, F. Huang and Y. Sun, *Adv. Mater.*, 2021, **33**, 2101733.
- S124. W. Zhang, Y. Yue, R. Yang, Y. Zhang, W. Du, G. Lu, J. Zhang, H. Zhou, X. Zhang and Y. Zhang, *Energy Environ. Sci.*, 2024, **17**, 2182-2192.
- S125. Y. Sun, C. Chen, L. Wang, C. Guo, J. Cai, D. Li, B. Zhou, C. Liu, D. Liu, T. Wang and W. Li, *ACS Materials Lett*, 2023, **5**, 1710-1717.
- S126. Y. Cui, Y. Xu, H. Yao, P. Bi, L. Hong, J. Zhang, Y. Zu, T. Zhang, J. Qin, J. Ren, Z. Chen, C. He, X. Hao, Z. Wei and J. Hou, *Adv. Mater.*, 2021, **33**, 2102420.

- S127. J. Gao, H. Bai, P. Li, Y. Zhou, W. Su, C. Liu, X. Li, Y. Wu, B. Hu, Z. Liang, Z. Bi, X. Li, L. Yan, H. Du, G. Lu, C. Gao, K. Wang, Y. Liu, W. Ma and Q. Fan, *Adv. Sci*, 2024, **11**, 2403334.
- S128. B. Zheng, X. Ma, Y. Yue, W. Peng, H. Shen, F. Zhang, J. Wang, P. Gao and L. Huo, *Adv. Funct. Mater*, 2025, **35**, 2500148.
- S129. C. Luo, D. Xia, J. Wu, J. Fang, Q. Xie, Y. Zhang, X. Jiang, L. Wan, S. You, L. Jiang, W. Li and C. Zhao, *Energy Fuels*, 2025, **39**, 4030-4037.
- S130. C. Chen, L. Wang, Y. Sun, Y. Fu, C. Guo, B. Zhou, Z. Gan, D. Liu, W. Li and T. Wang, *Adv. Funct. Mater*, 2023, **33**, 2305765.
- S131. Y. Yang, L. Wei, L. Zhan, Y. Liu, H. Lu, X. Wu, A. Wupur, T. Chen, J. Yu, X. Sun, H. Hu, R. Sun, J. Min, Y. Luo, J. Wu, W. Fu, S. Yin and H. Chen, *Adv. Mater*, 2025, **37**, e10980.
- S132. Z. Liu, C. Zhu, J. Xu, Y. Xu, J. Zeng, J. Wang, J. Zhang, P. Zhu, D. Wang, X. Zhou, Y. Zhang, X. Wang, L. Ying, L. Yan and B. Xu, *Nano Energy*, 2025, **137**, 110801.
- S133. X. Shi, J. Huang, X. Wang, H. Zheng, Y. Fang, S. Y. Jeong, H. Y. Woo and B. Huang, *ACS Appl. Mater. Interfaces*, 2025, **17**, 24274-24282.
- S134. X. Wang, Y. Shi, M. Li, S. Shen, Y. Zhou, R. Qin, X. Tang, J. Song and G. Wang, *ACS Appl. Mater. Interfaces*, 2025, **17**, 26940-26947.
- S135. Y. Xia, C. Wang, E. Guo, Z. Lu, H. Fan, B. Wang, X. Liu, C. Xiao, Y. Wu and W. Li, *ACS Appl. Mater. Interfaces*, 2024, **16**, 69660-69669.
- S136. H. Bin, S. Gao, X. Wang, F. Cao, Y. Chen, J. Zhang, L. Bu, X. Song and G. Lu, *Energy Environ. Sci*, 2024, **17**, 7803-7815.
- S137. W. Liang, S. Zhu, K. Sun, J. Hai, Y. Cui, C. Gao, W. Li, Z. Wu, G. Zhang and H. Hu, *Adv. Funct. Mater*, 2025, **35**, 2415499.
- S138. R. Ding, S. Wang, Z. Yang, J. Weng, C. Li, Z. Liu, Z. Zhang, J. Zhang, Z. Tang, Y. Cai and H. Huang, *J. Mater. Chem. A*, 2025, **13**, 33356-33364.
- S139. X. Yu, J. Zhu, L. Xie, H. Hu, T. Liu, P. Ding, X. Yu, J. Ge, C. Han, W. Song and Z. Ge, *Energy Environ. Sci*, 2025, **18**, 6094-6105.
- S140. J. Zhu, R. Zeng, E. Zhou, C. Li, J. Deng, M. Du, Q. Guo, M. Ji, Z. Wang, Y. Lin, F. Han, J. Zhuang, S. Tan, L. Kan, L. Zhu, M. Zhang and F. Liu, *J. Am. Chem. Soc*, 2025, **147**, 24491-24501.
- S141. H. Lu, W. Su, N. Wei, X. Wang, Y.-N. Chen, Y. Lin, W. Zhang, Y. Wei, H. Li, W. Zhao, L. Jia, Y. Liu, Z. Ma and Z. Bo, *Adv. Energy Mater*, 2025, **15**, 2502316.
- S142. L. Chen, W. Liang, A. Sergeev, J. Y. L. Lai, X. Zeng, K. S. Wong, J. Zhang, S. H. Pun, H. Yan and H. Hu, *Energy Environ. Sci*, 2025, **18**, 6608-6617.
- S143. W. Shi, Q. Han, W. Zhao, R. Wang, L. Li, G. Song, X. Chen, G. Long, Z. Yao, Y. Lu, C. Li, X. Wan and Y. Chen, *Energy Environ. Sci*, 2025, **18**, 5356-5364.
- S144. Y. Chen, X. Duan, J. Zhang, Z. Ge, H. Ma, X. Sun, H. Zhang, J. Gao, X. Wang, X. Wang, Z. Tang, R. Yang, F. Gao and Y. Sun, *Energy Environ. Sci*, 2025, **18**, 6214-6223.
- S145. C. Xu, J. Yang, S. Gámez-Valenzuela, J.-W. Lee, J. Che, P. Chen, G. Zhang, D. Hu, Y. Wang, J. Lv, Z. Zhong, X. Chen, G. Zhang, F. Zhao, B. J. Kim, X. Guo and B. Liu, *Energy Environ. Sci*, 2025, **18**, 5913-5925.
